# Supplementary material for: Carbon Dioxide Enrichment PEBAX/MOF Composite Membrane for CO2 Separation
Source: MDPI journal article supplement (doi:10.3390/membranes11060404), 2021-05-28
Supplement: s1 [file s1]

## Supporting Information

# Carbon Dioxide Enrichment PEBAX/MOF Composite Membrane for CO<sub>2</sub> Separation

Po-Hsiang Tang <sup>1</sup>, Pamela Berilyn So <sup>2</sup>, Wa-Hua Li <sup>2</sup>, Zi-You Hui <sup>2</sup>, Chien-Chieh Hu <sup>3,4,\*</sup> and Chia-Her Lin <sup>1,4,\*</sup>

<sup>1</sup> Department of Chemistry, National Taiwan Normal University, Wenshan District, Taipei 11677, Taiwan; fetivear@gmail.com

<sup>2</sup> Department of Chemistry, Chung Yuan Christian University, Zhongli District, Taoyuan City 32023, Taiwan; pbtiuso@gmail.com (P.B.S.); s651724@gmail.com (W.-H.L.); zgg7674@gmail.com (Z.-Y.H.)

<sup>3</sup> Graduate Institute of Applied Science and Technology, National Taiwan University of Science and Technology, Taipei 10607, Taiwan

<sup>4</sup> R&D Center for Membrane Technology, Chung Yuan Christian University, Zhongli District, Taoyuan City 32023, Taiwan

\* Correspondence: cchu@mail.ntust.edu.tw (C.-C.H.); chiaher@ntnu.edu.tw (C.-H.L.)

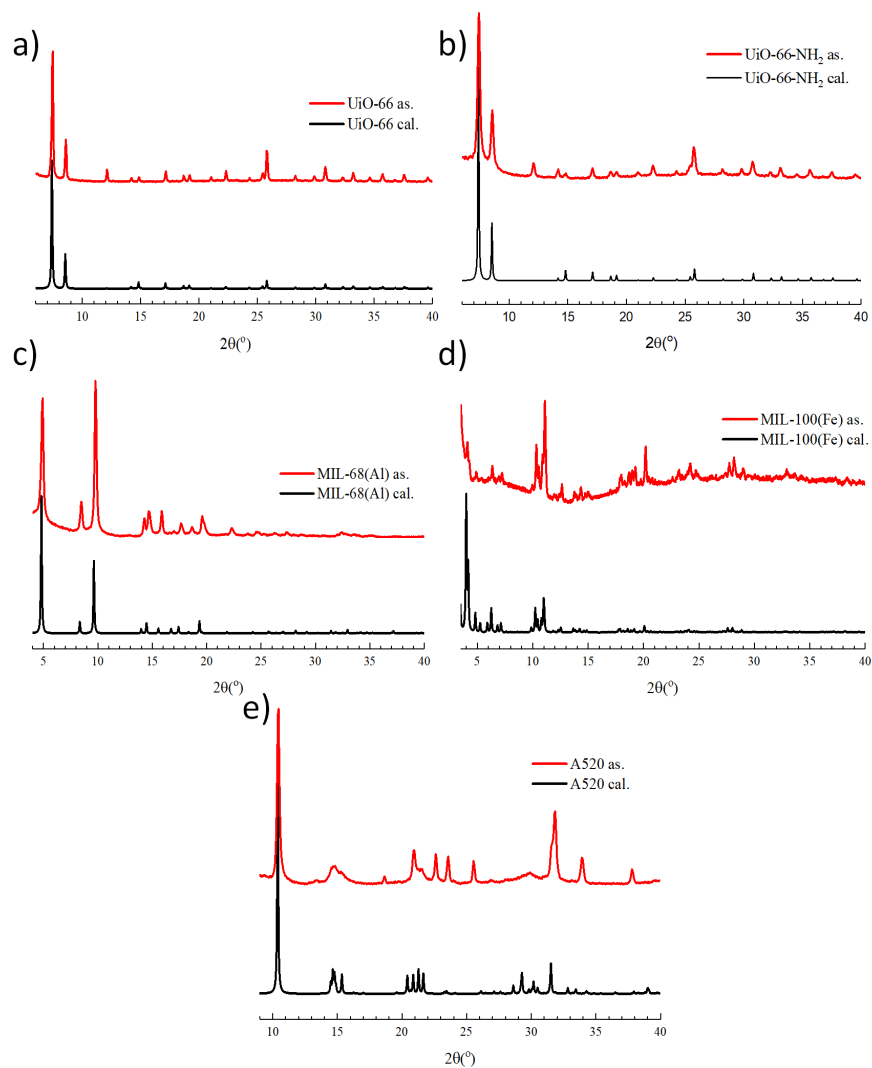

**Figure S1.** Comparison of PXRD pattern of the synthesized MOFs with the calculated PXRD patterns. a) ZIF-8, b) UiO-66, c) UiO-66-NH<sub>2</sub>, d) MIL-68(Al), e) MIL-100(Fe), f) A520.

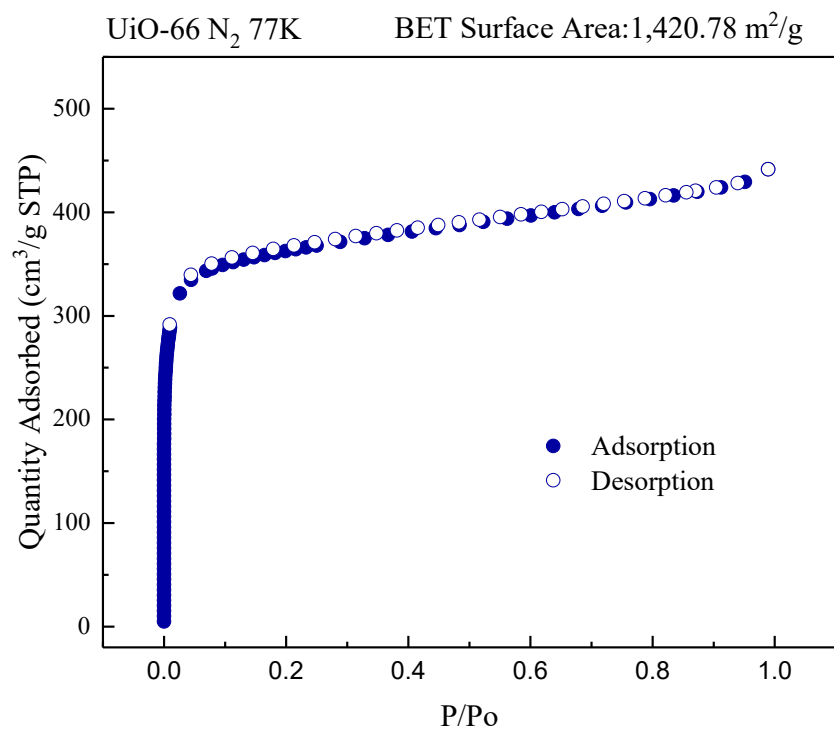

Figure S2. UiO-66 N<sub>2</sub> isotherm.

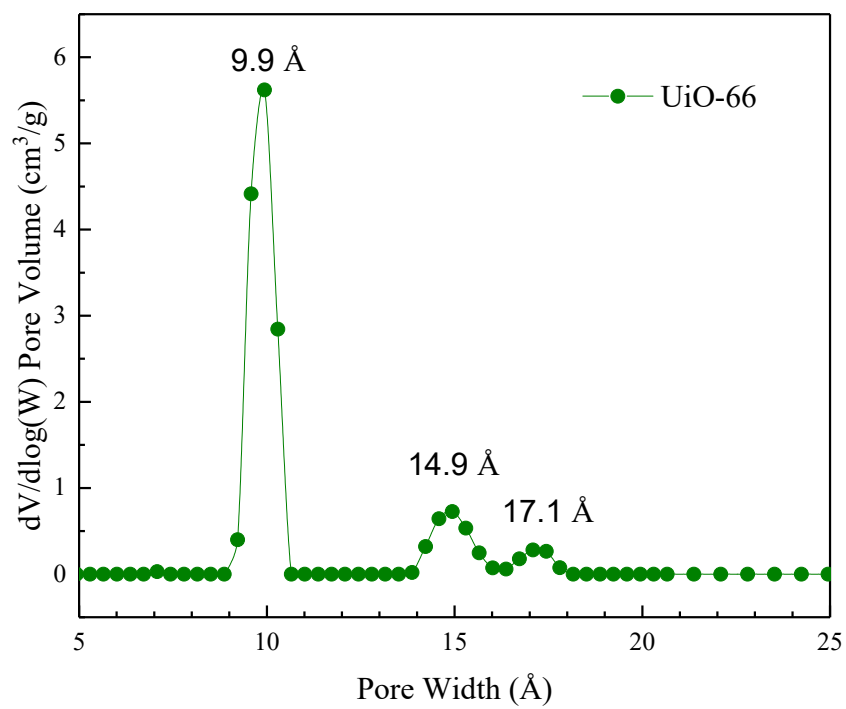

Figure S3. UiO-66 pore size distribution.

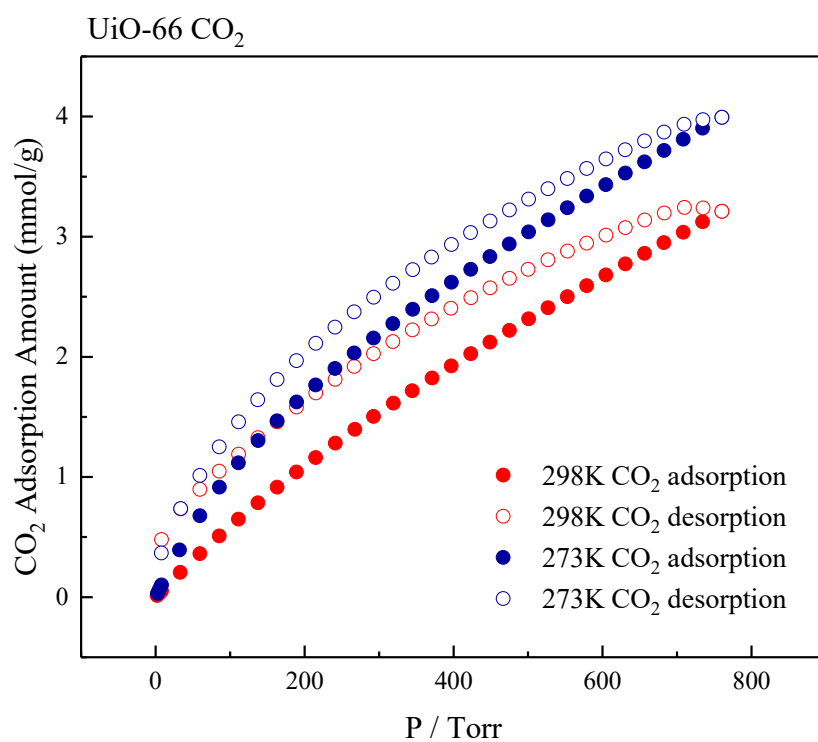

Figure S4. UiO-66 CO<sub>2</sub> isotherm.

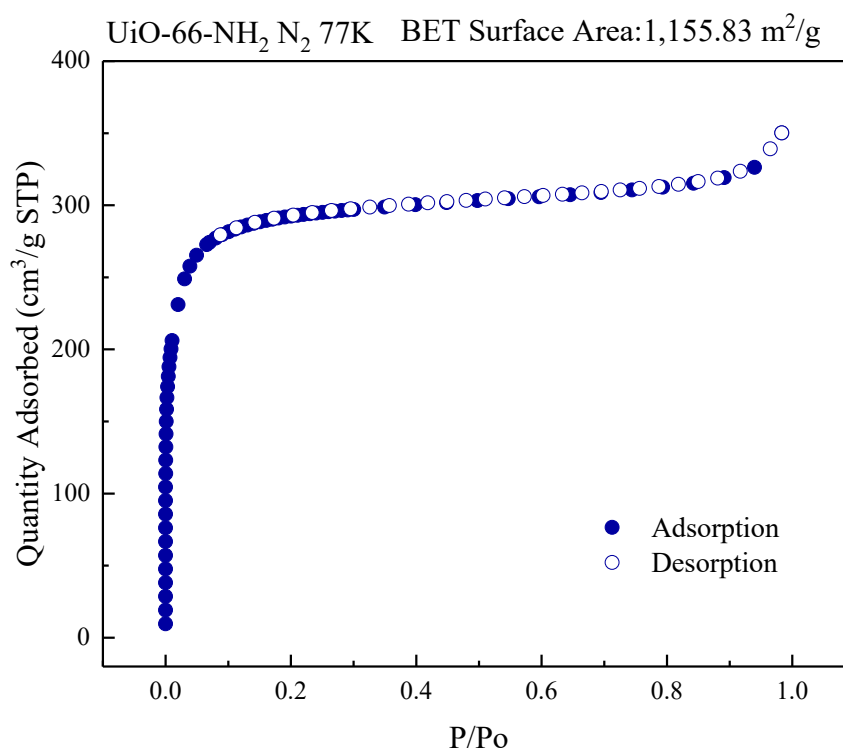

Figure S5. UiO-66-NH<sub>2</sub> N<sub>2</sub> isotherm.

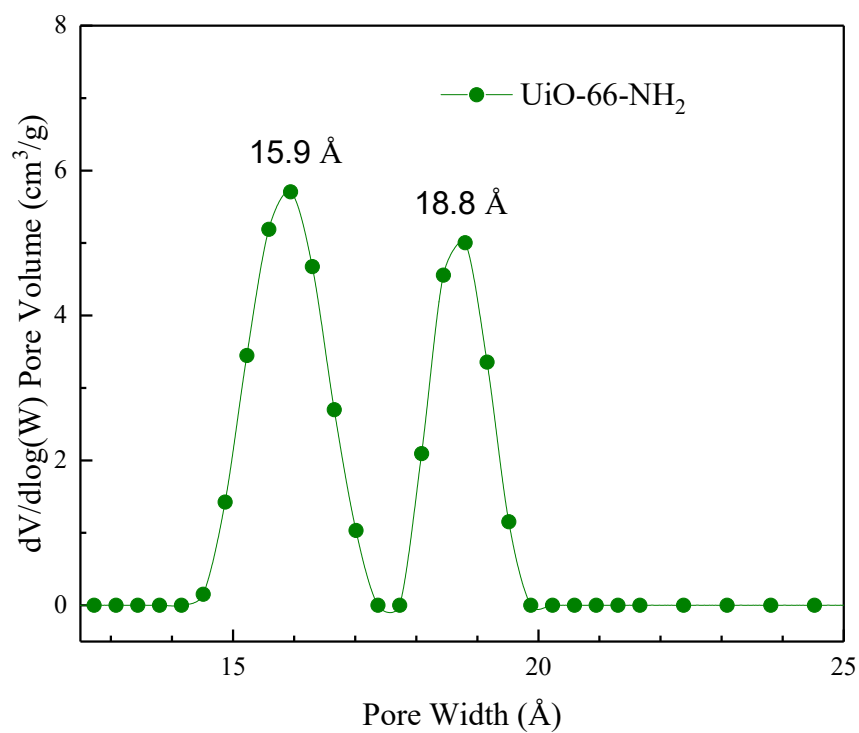

Figure S6. UiO-66-NH<sub>2</sub> pore size distribution.

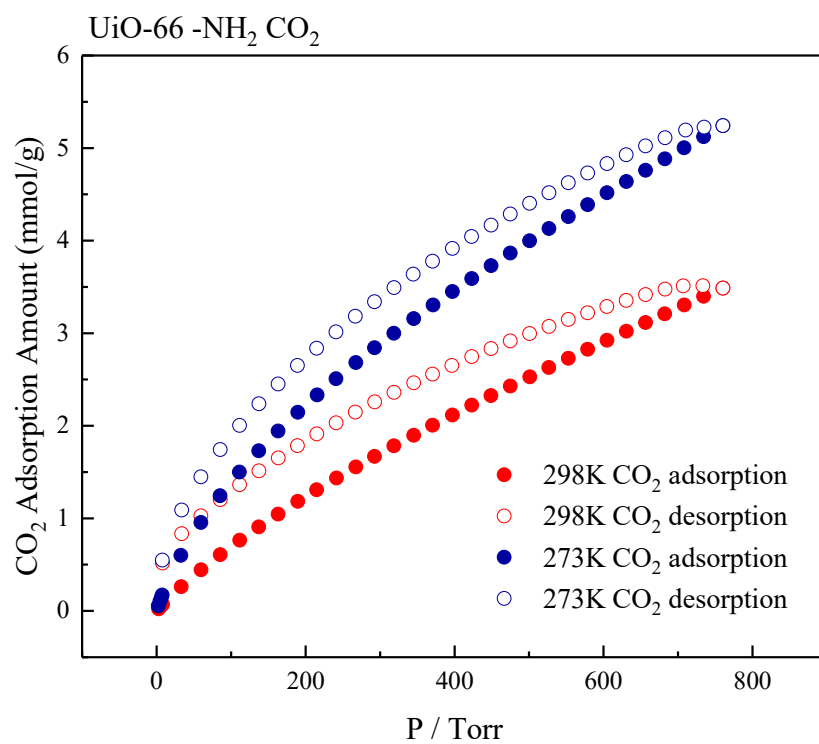

Figure S7. UiO-66-NH<sub>2</sub> CO<sub>2</sub> isotherm.

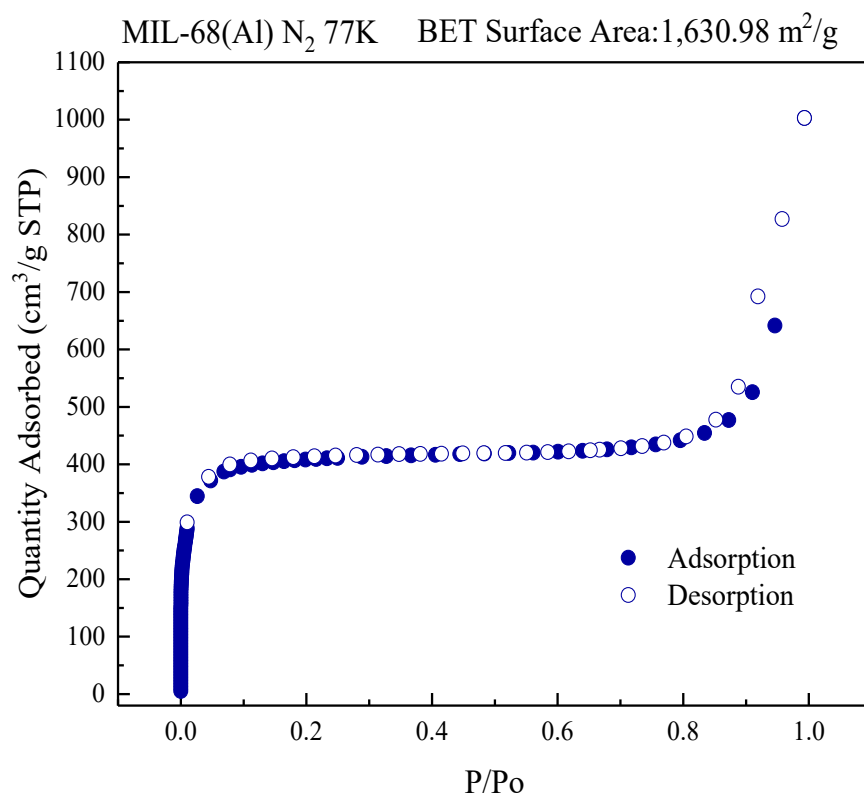

Figure S8. MIL-68(Al) N<sub>2</sub> isotherm.

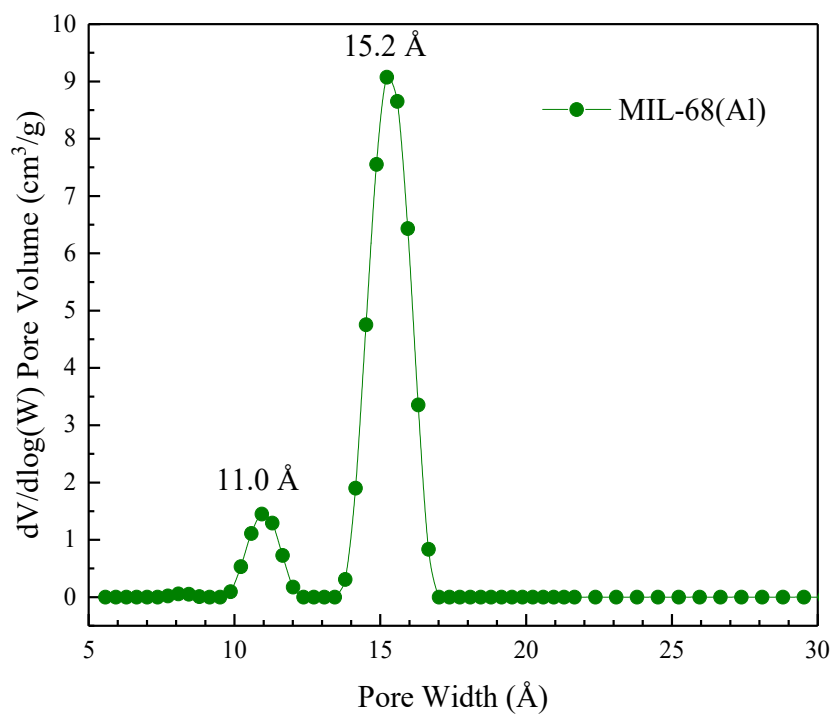

Figure S9. MIL-68(Al) pore size distribution.

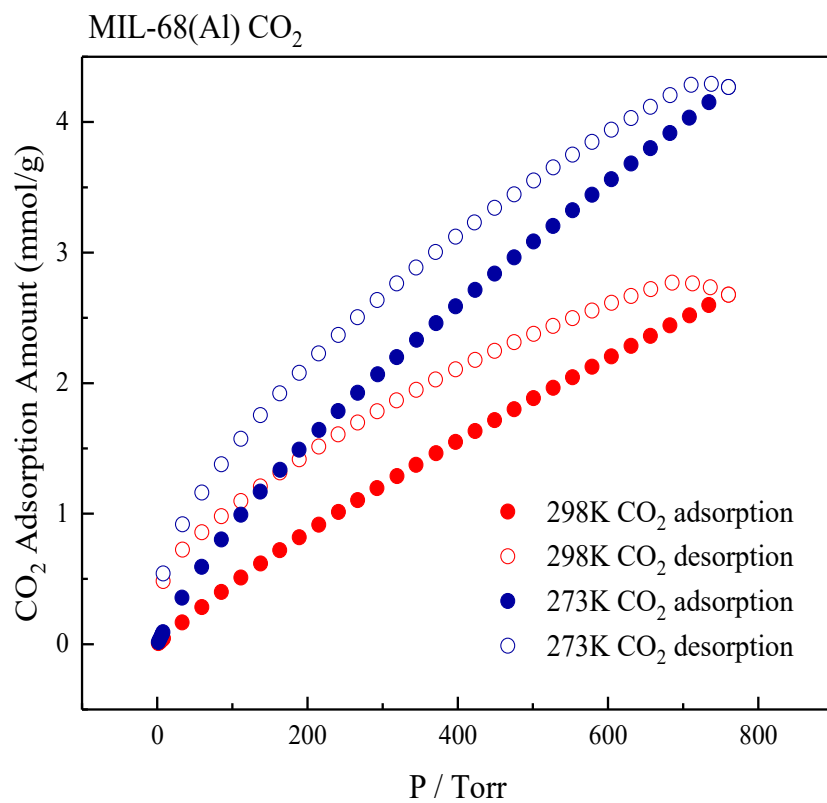

Figure S10. MIL-68(Al) CO<sub>2</sub> isotherm.

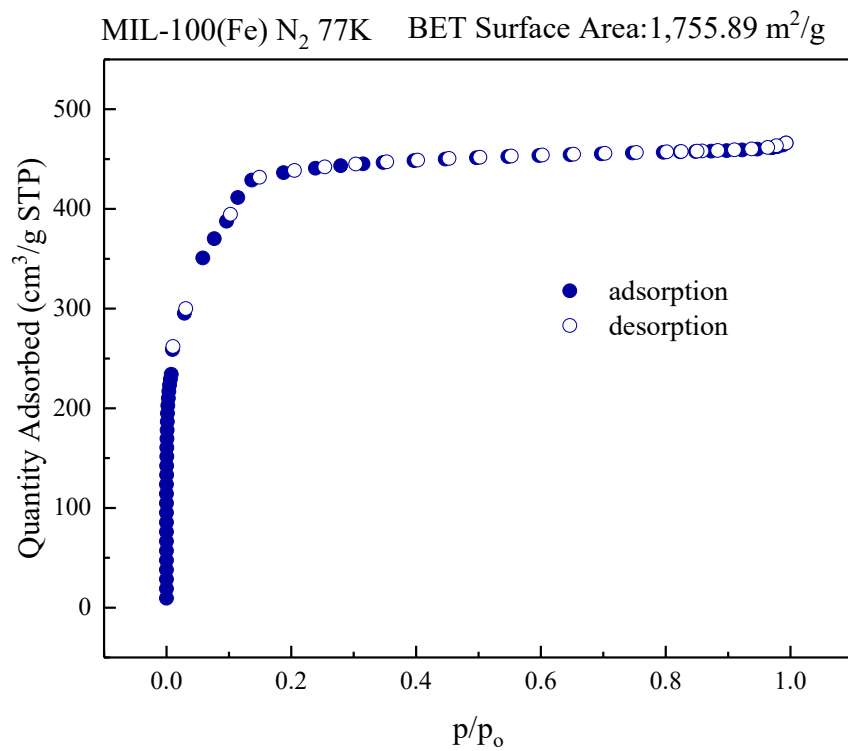

Figure S11. MIL-100(Fe) N<sub>2</sub> isotherm.

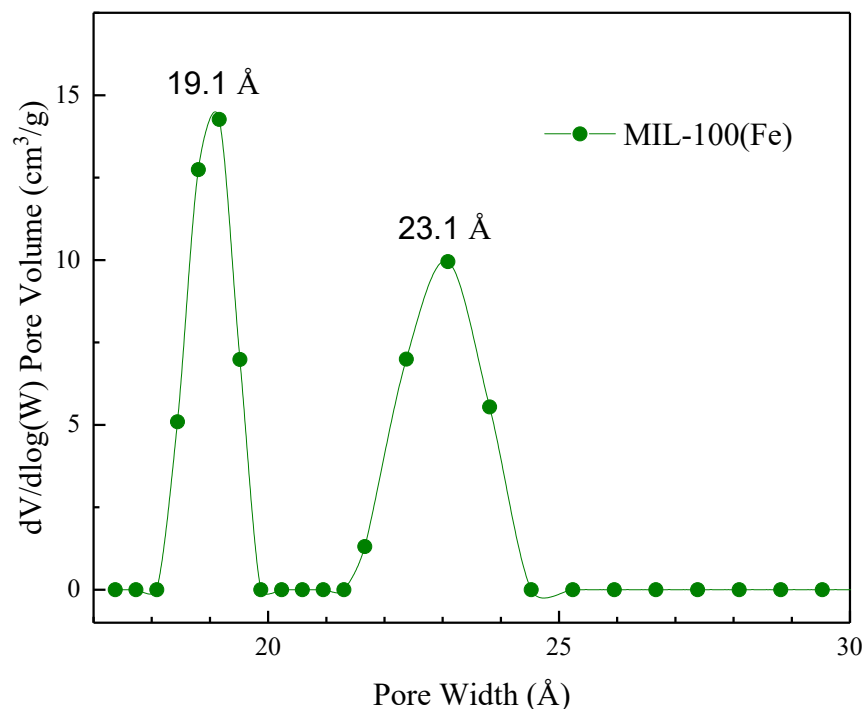

Figure S12. MIL-100(Fe) pore size distribution.

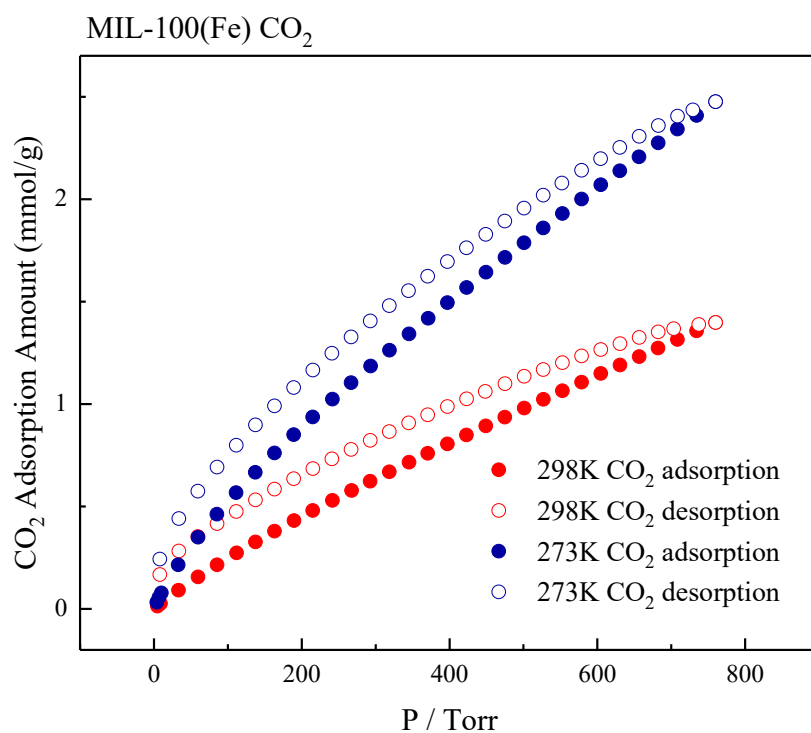

Figure S13. MIL-100(Fe)  $\text{CO}_2$  isotherm.



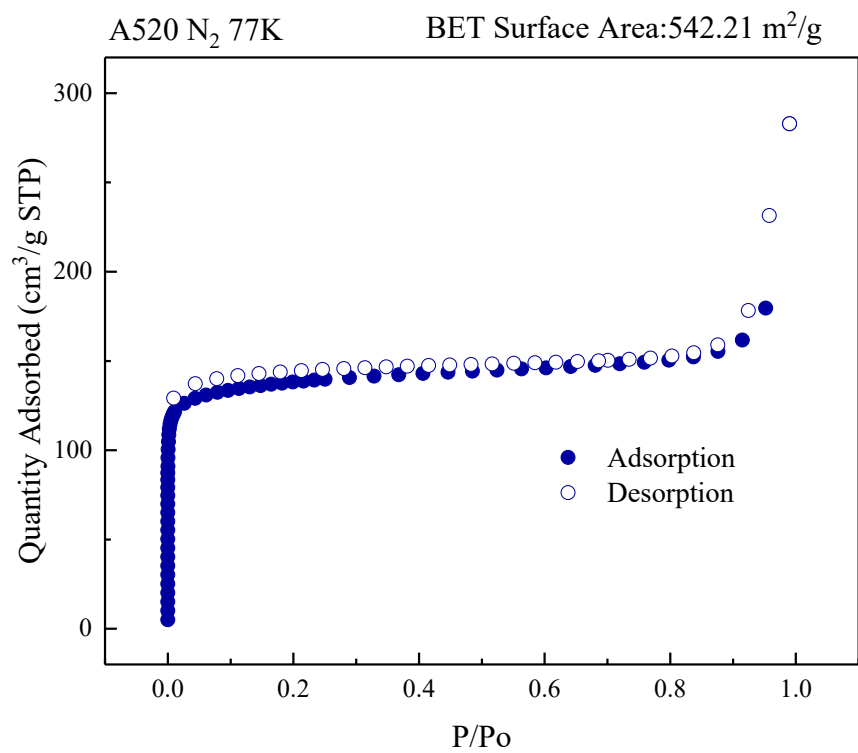

Figure S14. A520 N<sub>2</sub> isotherm.

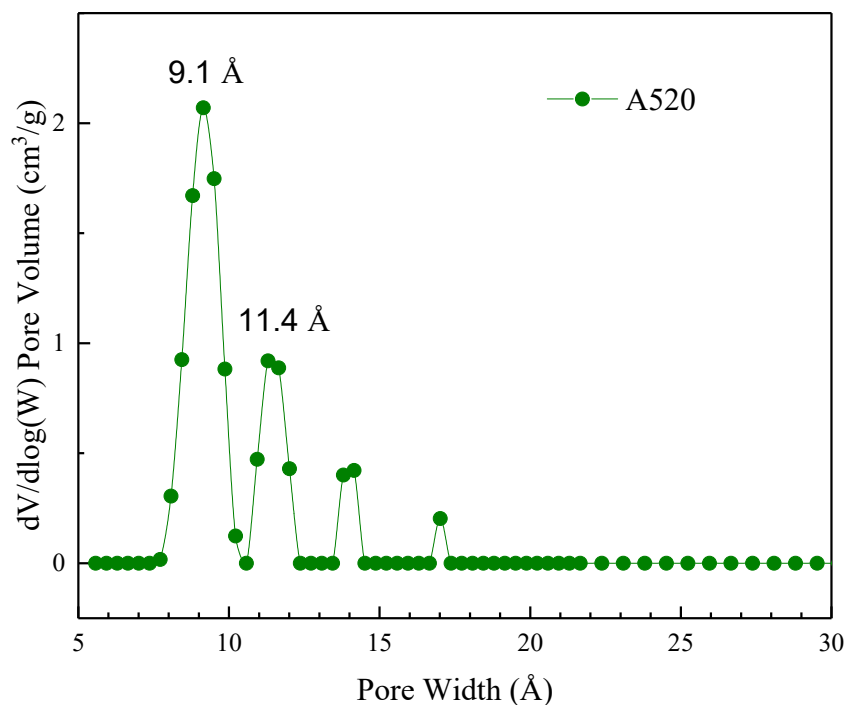

Figure S15. A520 pore size distribution.

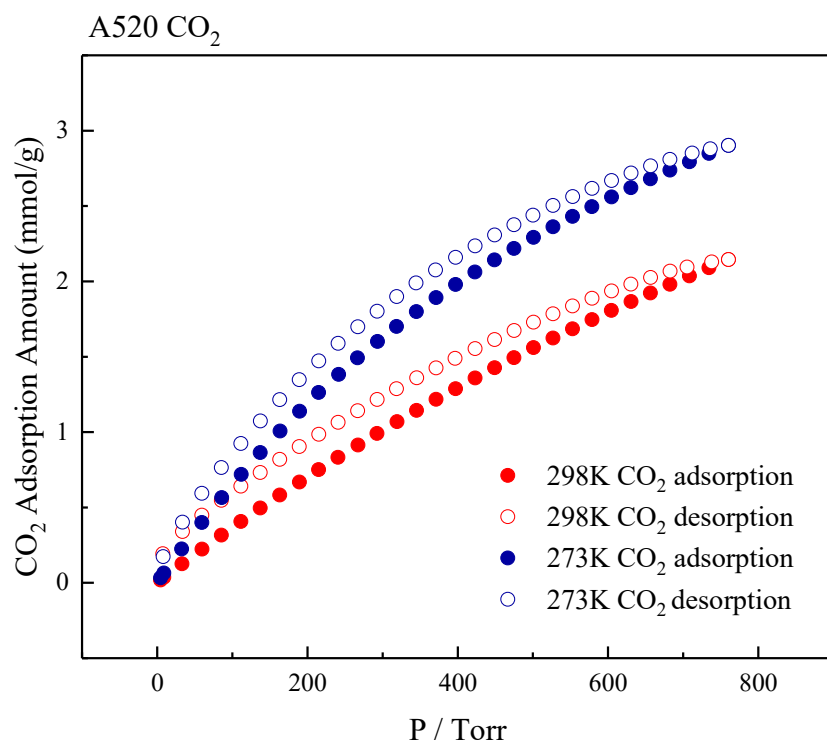

Figure S16. A520 CO<sub>2</sub> isotherm.

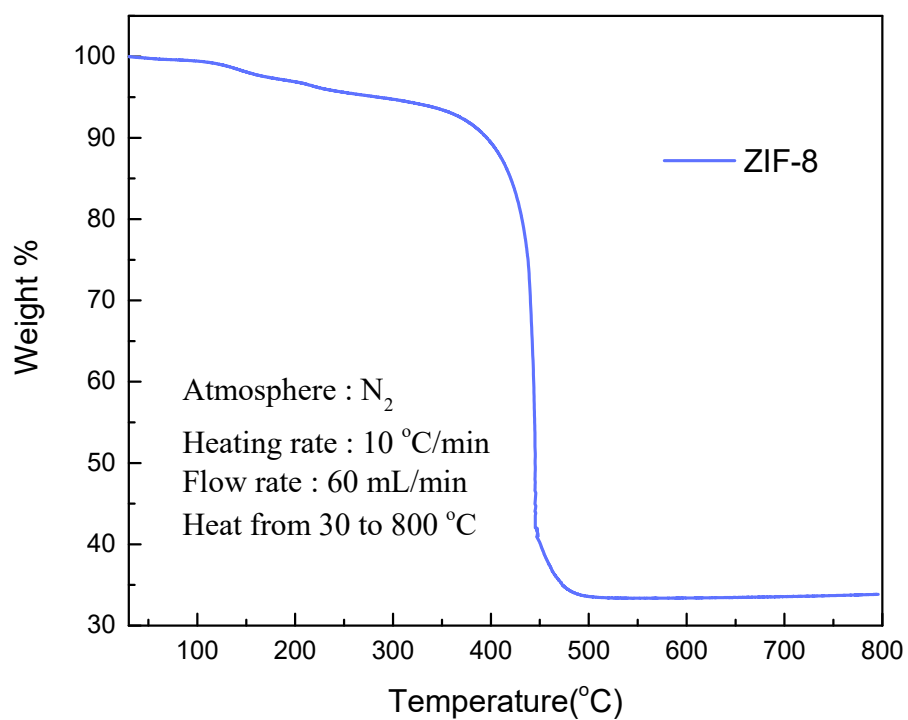

Figure S17. TGA curve of ZIF-8.

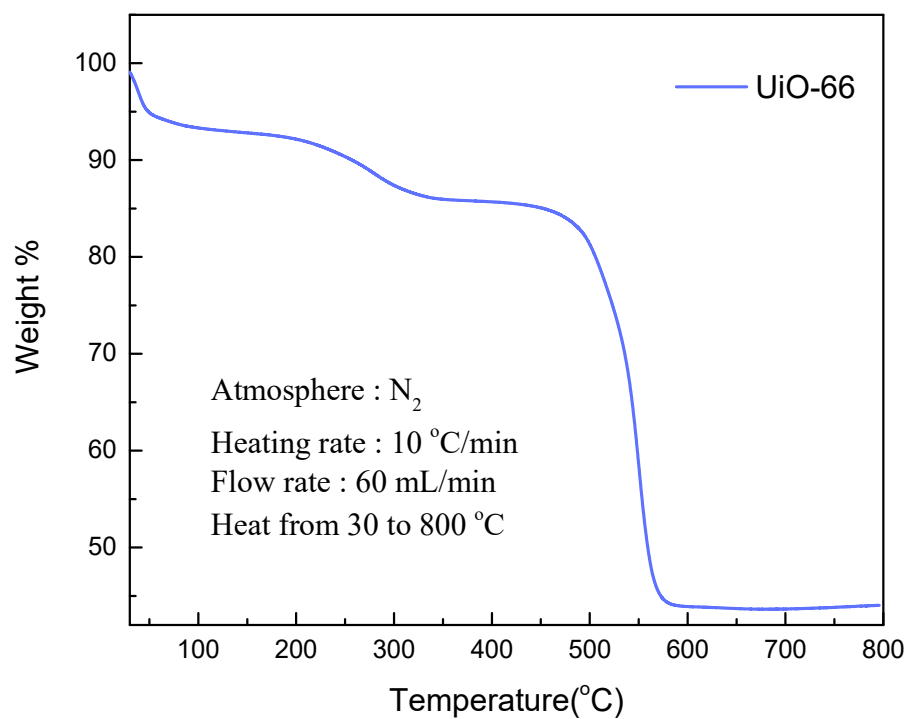

Figure S18. TGA curve of UiO-66.

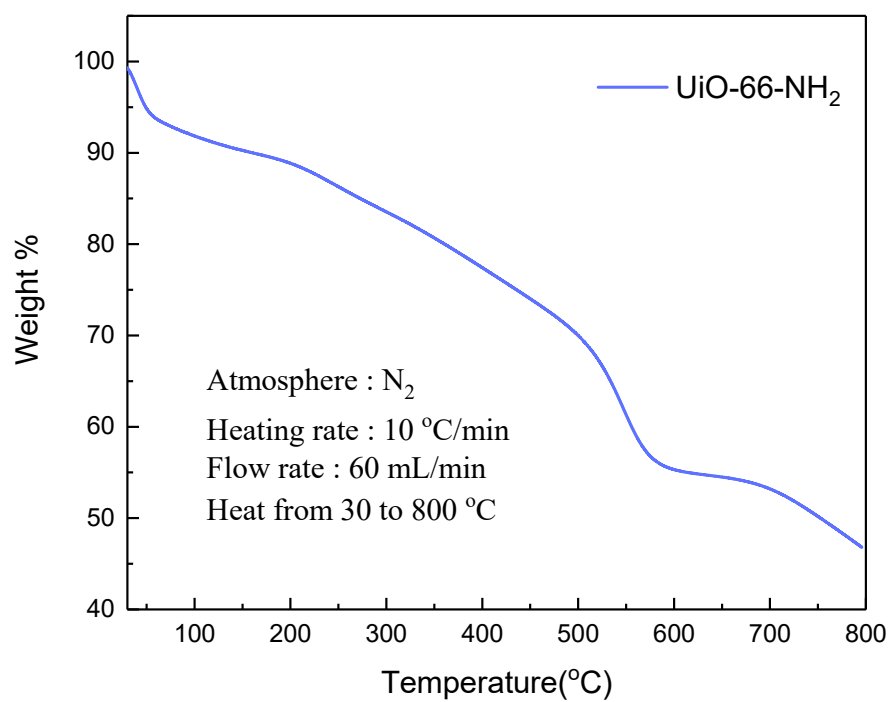

Figure S19. TGA curve of UiO-66-NH<sub>2</sub>.

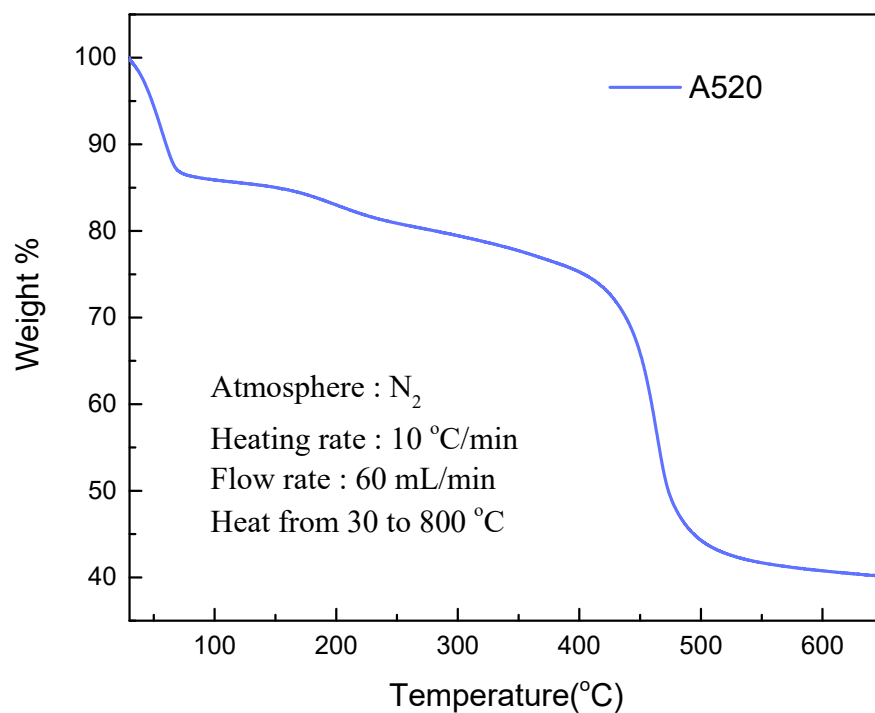

Figure S20. TGA curve of A520.

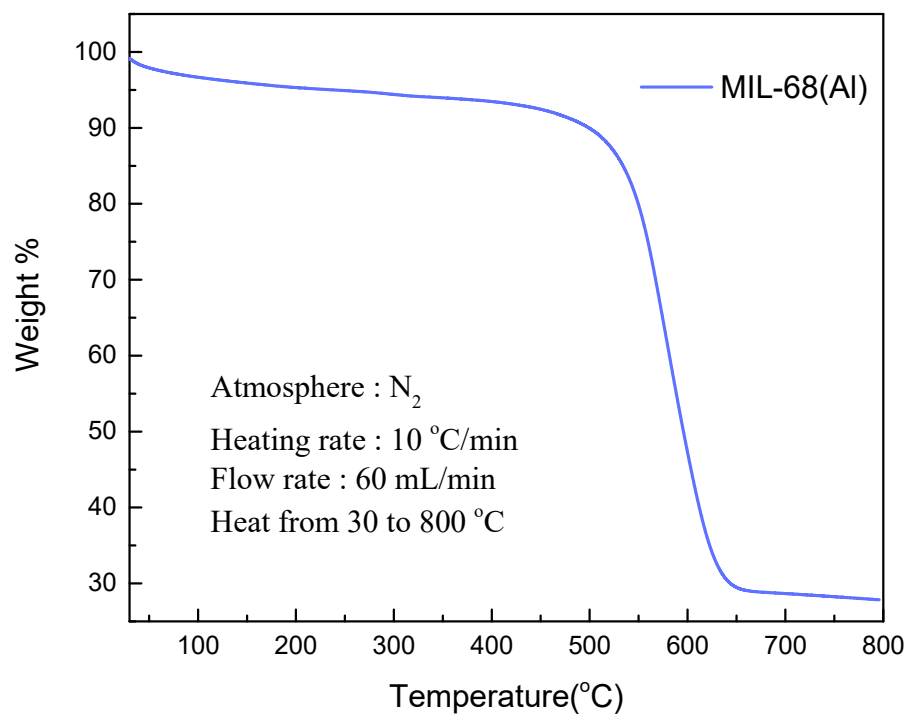

Figure S21. TGA curve of MIL-68(Al).

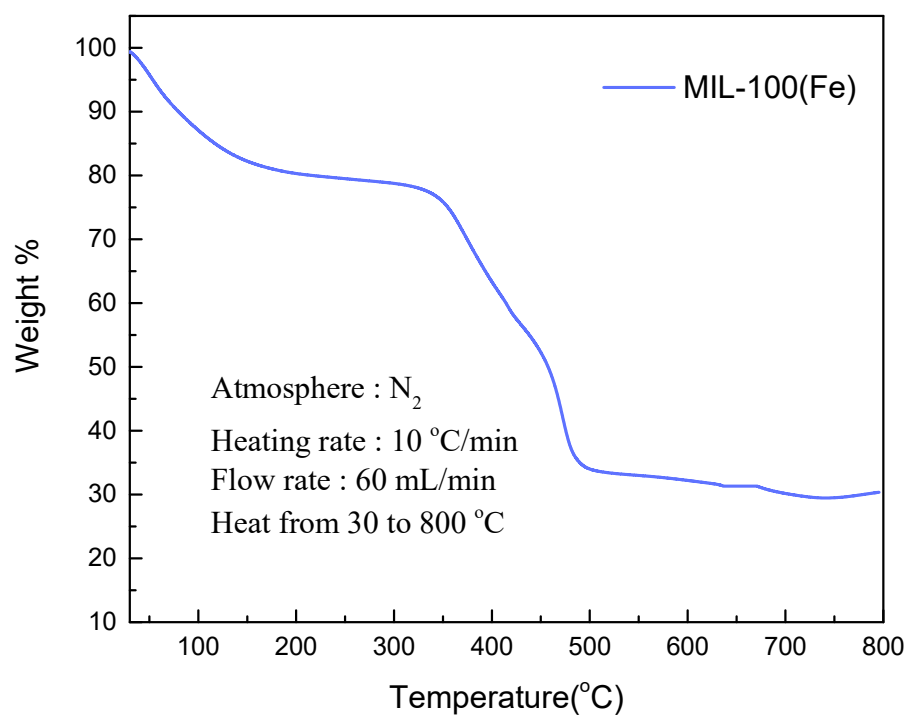

**Figure S22.** TGA curve of MIL-100(Fe).

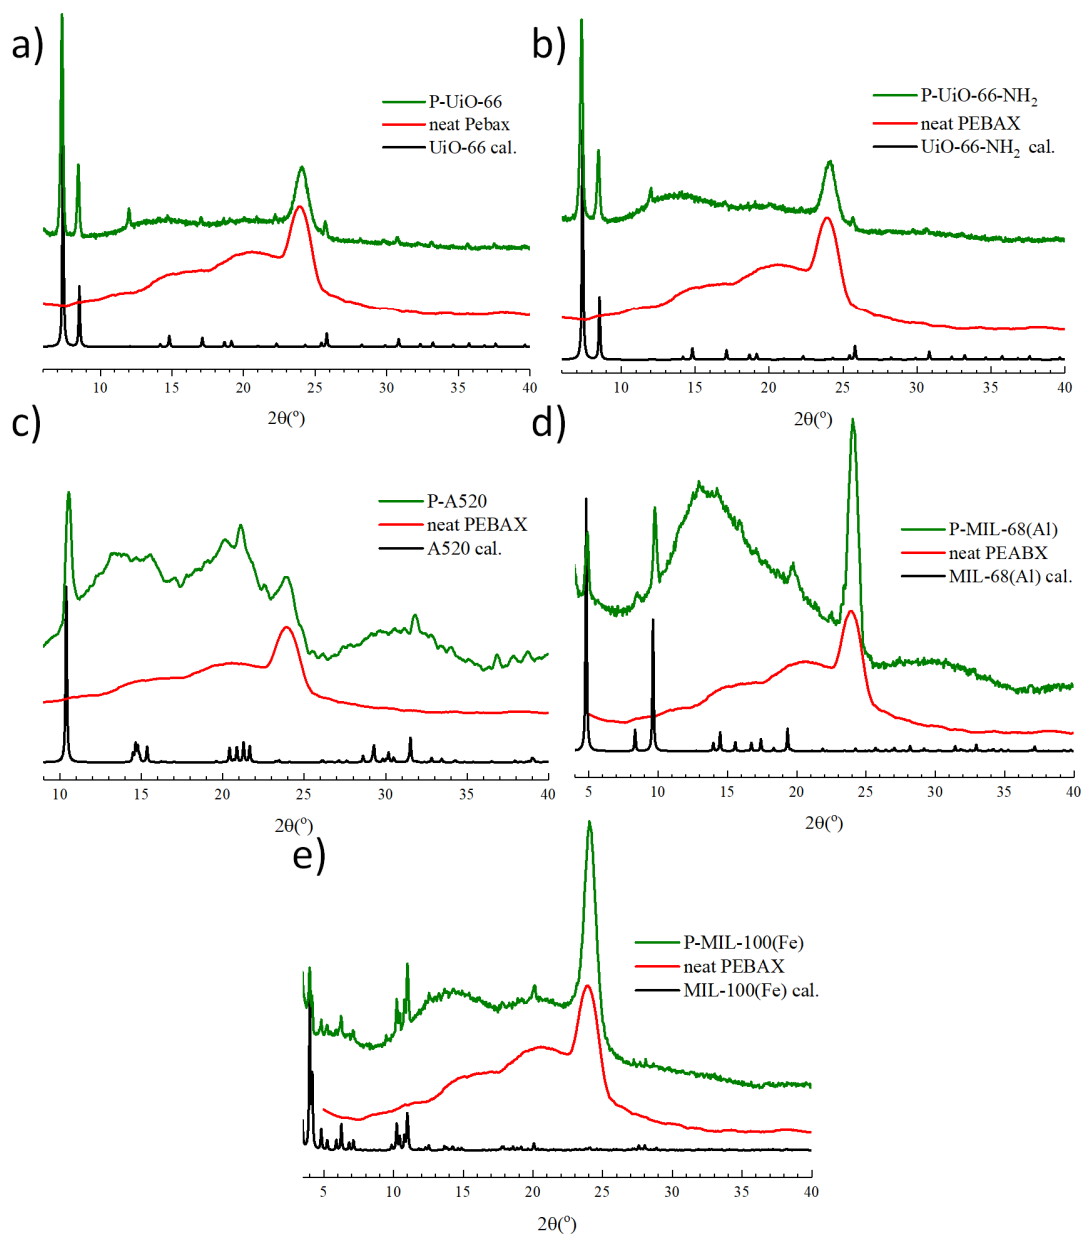

**Figure S23.** PXRD pattern of (a)P-UiO-66, (b)P-UiO-66-NH<sub>2</sub>, (c)P-A520 (d)P-MIL-68(Al), (e)P-MIL-100(Fe).

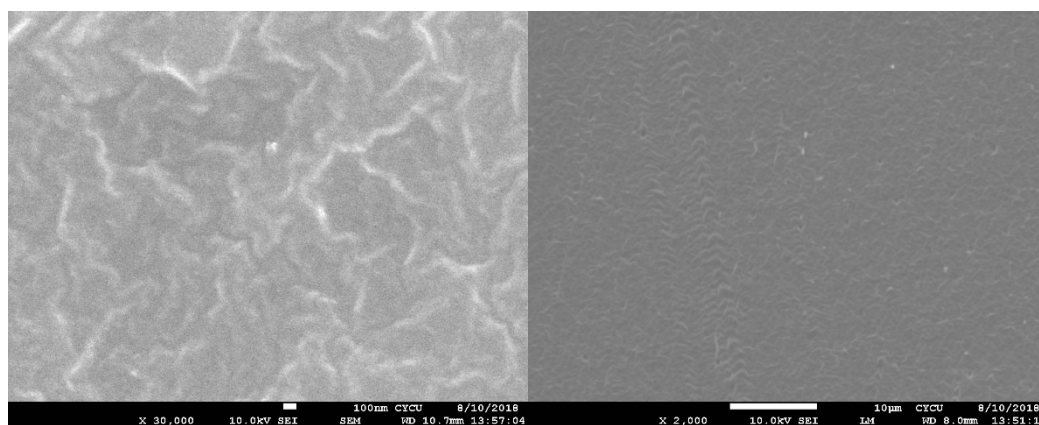

**Figure S24.** Neat PEBAX SEM image (left: surface, right:cross-section).

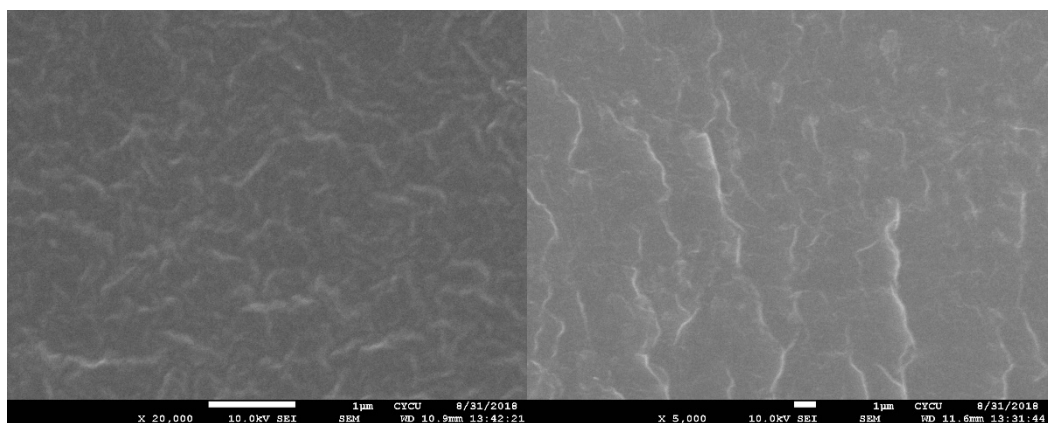

**Figure S25.** P-Z1 SEM image (left: surface, right:cross-section).

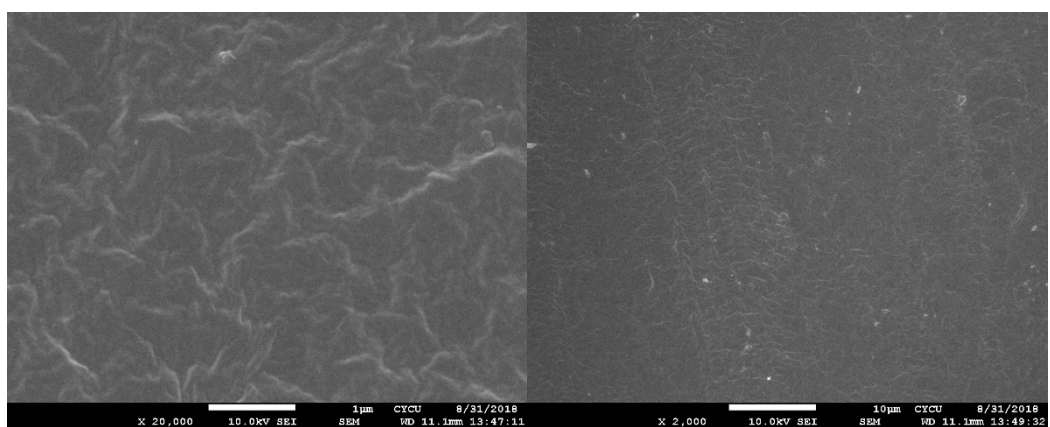

**Figure S26.** P-Z3 SEM image (left: surface, right:cross-section).

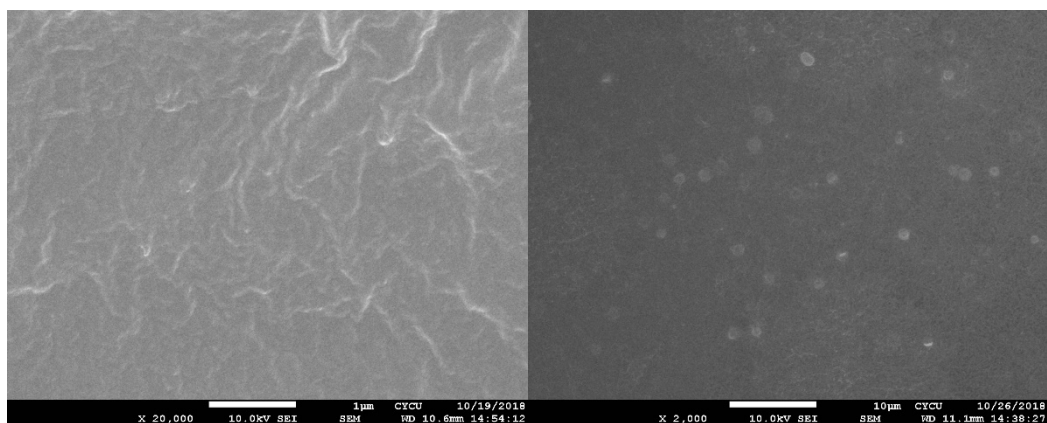

**Figure S27.** P-Z5 SEM image (left: surface, right:cross-section).

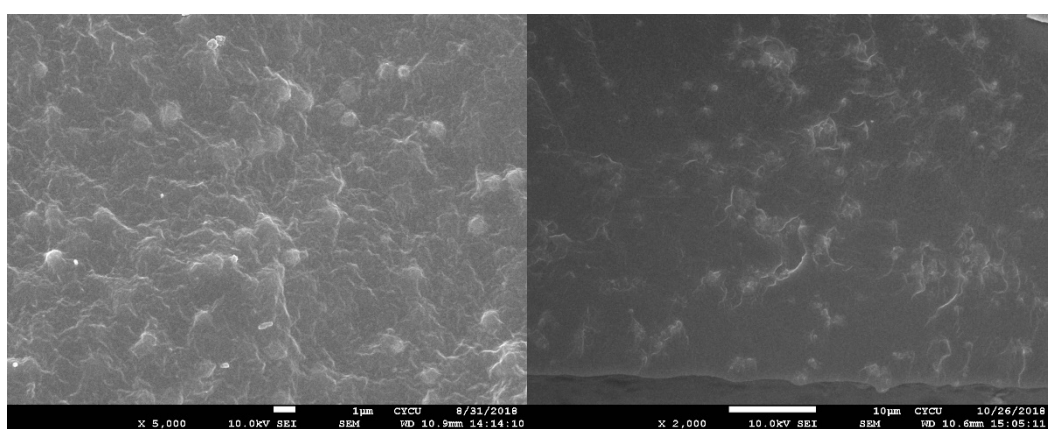

**Figure S28.** P-Z8 image (left: surface, right:cross-section).

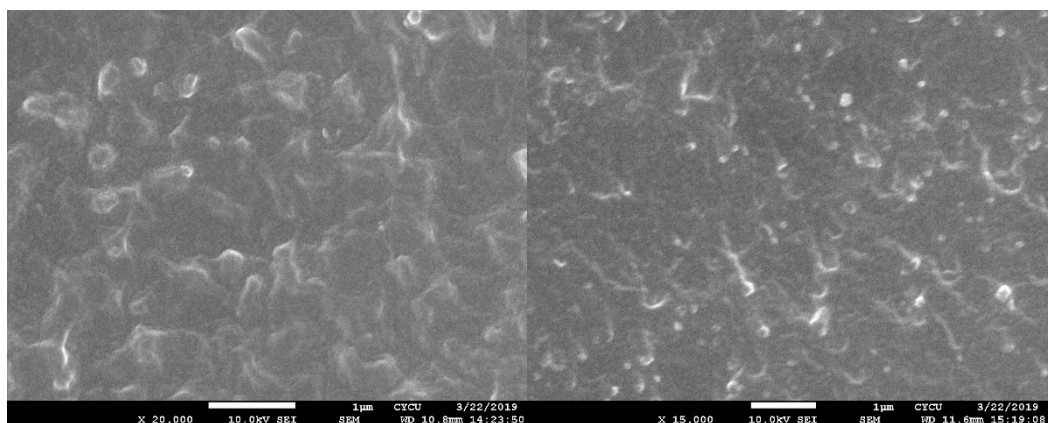

**Figure 29.** P-Z10 image (left: surface, right:cross-section).



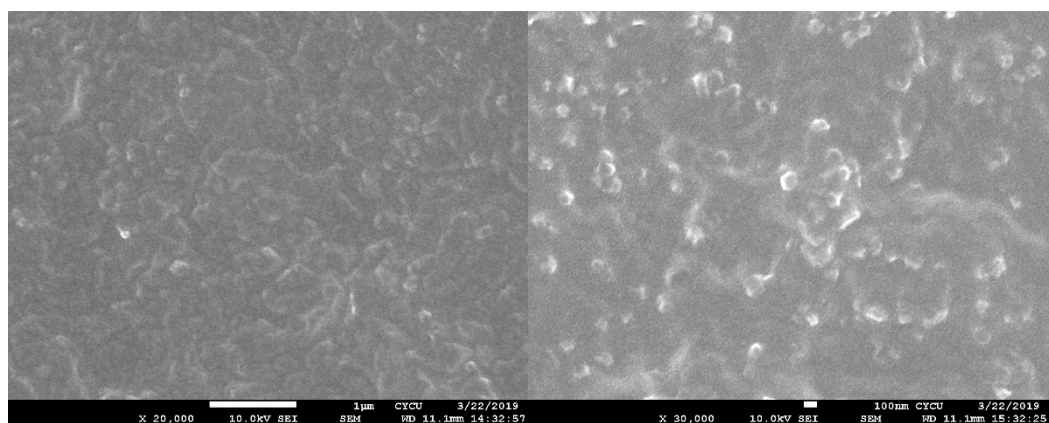

Figure S30. P-Z20 image (left: surface, right:cross-section).

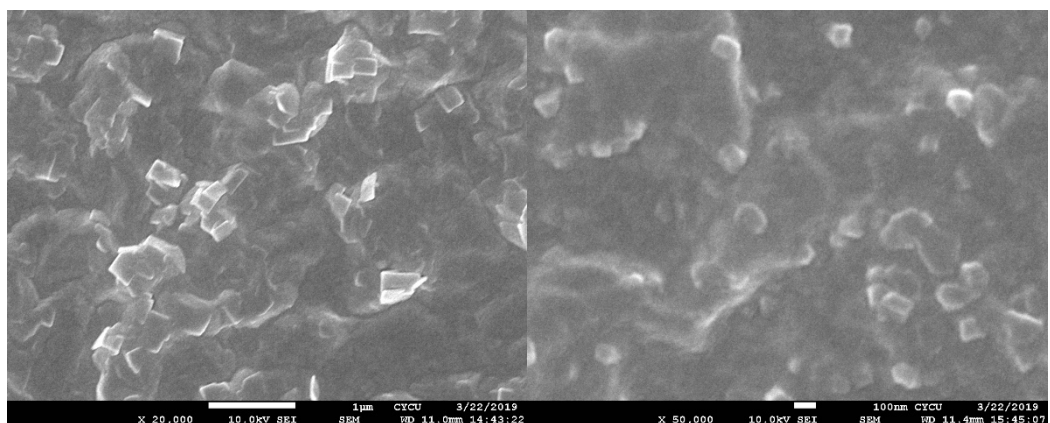

Figure S31. P-Z30 image (left: surface, right:cross-section).

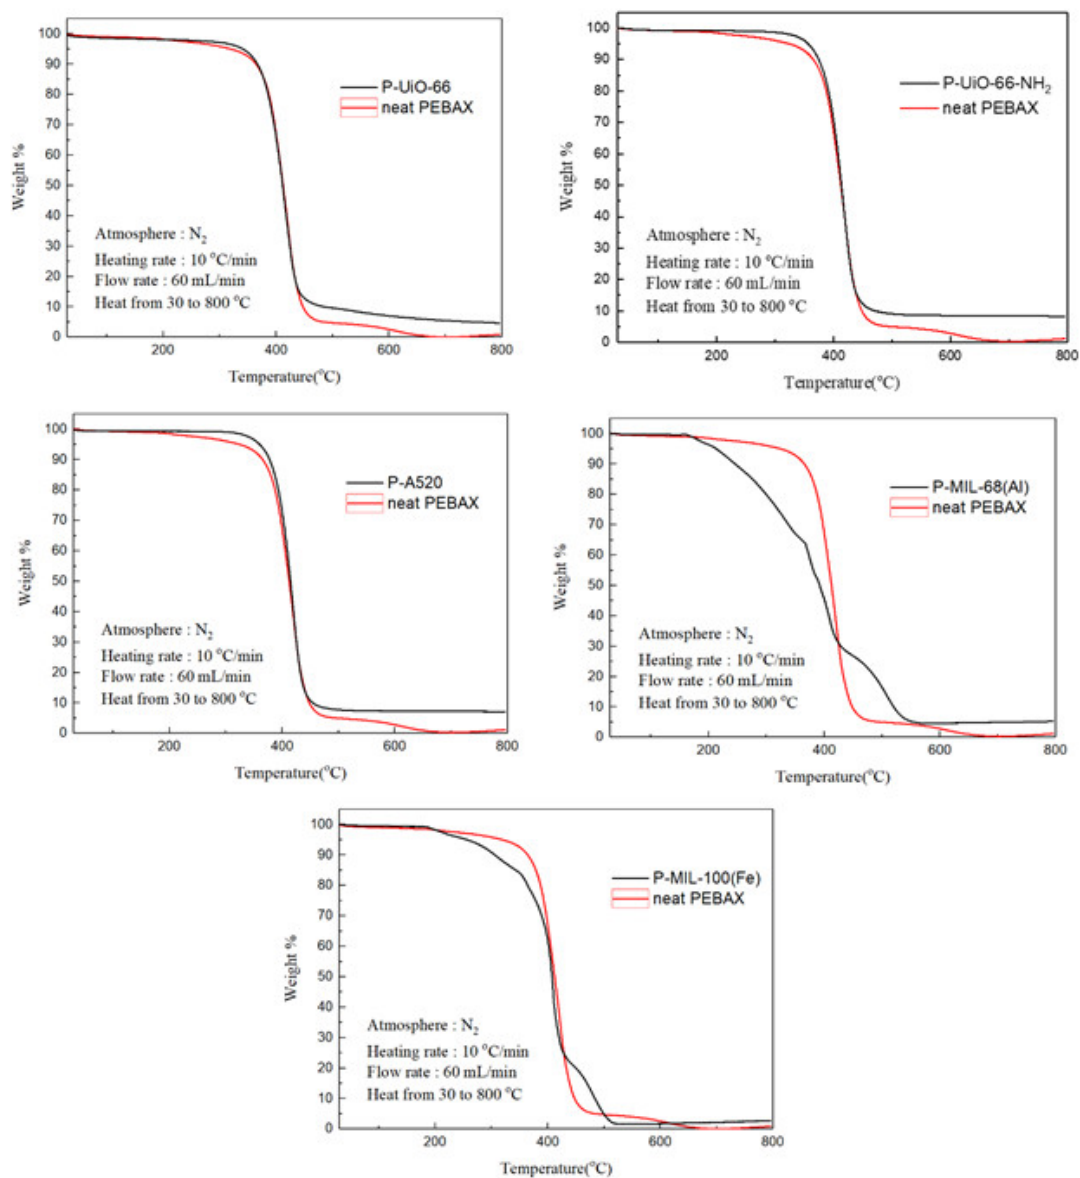

**Figure S32.** TGA curve of Pebax/5 wt% MOF MMMs and neat Pebax.

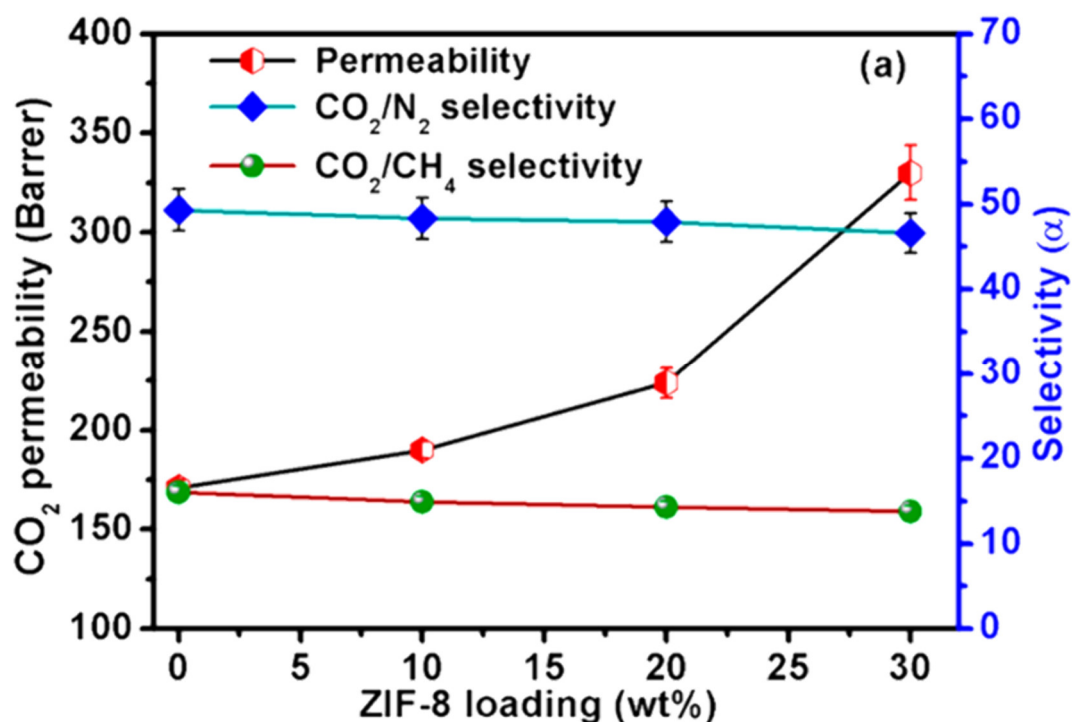

**Figure S33.** The gas permeability and gas separation selectivity of Pebax/ZIF-8 MMMs in the literature.

**Table S1 N<sub>2</sub> Adsorption**

|                        | Adsorption<br>(cm <sup>3</sup> /g STP) | Surface Area<br>(m <sup>2</sup> /g) | Total Pore<br>Volume (Å) | Pore Size<br>(cm <sup>3</sup> /g) |
|------------------------|----------------------------------------|-------------------------------------|--------------------------|-----------------------------------|
| ZIF-8                  | 432.87                                 | 2013.45                             | 0.70                     | 8-15                              |
| UiO-66                 | 390.69                                 | 1420.78                             | 0.68                     | 8-12                              |
| UiO-66-NH <sub>2</sub> | 303.19                                 | 1155.83                             | 0.45                     | 15-20                             |
| MIL-53(Al)             | 350.54                                 | 1412.07                             | 0.53                     | 11-13                             |
| A520                   | 144.89                                 | 542.21                              | 0.44                     | 8-18                              |
| MIL-68(Al)             | 371.93                                 | 1630.98                             | 1.55                     | 10-17                             |
| MIL-100(Fe)            | 413.09                                 | 1093                                | 0.71                     | 18-24                             |

**Table S2 CO<sub>2</sub> Adsorption**

|                        | CO <sub>2</sub> Adsorption at 298 K<br>(mmol/g) | CO <sub>2</sub> Adsorption at 273 K<br>(mmol/g) |
|------------------------|-------------------------------------------------|-------------------------------------------------|
| ZIF-8                  | 0.9                                             | 1.6                                             |
| UiO-66                 | 3.2                                             | 4.1                                             |
| UiO-66-NH <sub>2</sub> | 3.5                                             | 5.3                                             |
| MIL-53(Al)             | 1.5                                             | 1.8                                             |
| A520                   | 2.2                                             | 2.9                                             |

|             |     |     |
|-------------|-----|-----|
| MIL-68(Al)  | 2.6 | 4.2 |
| MIL-100(Fe) | 1.4 | 2.5 |

**Table S3. PEBAX/n wt% ZIF-8 MMMs gas separation efficiency**

| Item       | P <sub>CO2</sub> (Barrer) | P <sub>N2</sub> (Barrer) | Selectivity |
|------------|---------------------------|--------------------------|-------------|
| neat PEBAX | 166.30                    | 3.44                     | 48.25       |
| P-Z1       | 171.30                    | 3.46                     | 49.41       |
| P-Z3       | 196.00                    | 3.93                     | 49.79       |
| P-Z5       | 195.16                    | 3.80                     | 51.32       |
| P-Z8       | 194.49                    | 3.76                     | 51.61       |
| P-Z10      | 199.57                    | 3.70                     | 53.88       |
| P-Z20      | 229.05                    | 4.10                     | 55.80       |
| P-Z30      | 263.94                    | 4.65                     | 56.75       |

**Table S4. PEBAX/5wt% MOF GPA measurement**

| Item                     | P <sub>CO<sub>2</sub></sub> (barrer) | P <sub>N<sub>2</sub></sub> (barrer) | Selectivity |
|--------------------------|--------------------------------------|-------------------------------------|-------------|
| P-UiO-66                 | 189.77                               | 2.20                                | 85.94       |
| P-UiO-66-NH <sub>2</sub> | 183.96                               | 3.61                                | 50.89       |
| P-A520                   | 161.39                               | 2.79                                | 57.75       |
| P-MIL-68(Al)             | 183.55                               | 2.34                                | 78.16       |
| PMIL-100(Fe)             | 192.15                               | 2.77                                | 69.24       |
